# Supplementary material for: The Physical Exercise and Cardiovascular Adaptation Monitoring in Pregnancy (PE-CAMP) Randomised Controlled Trial Protocol
Source: bioRxiv or medRxiv preprint supplement (doi:10.1101/2022.04.27.22274359), 2022-04-28
Supplement: Supplementary file [file media-2.pdf]

# CERT ✓ Consensus on **E**xercise **R**eporting **T**emplate

## A Checklist for what to include when reporting exercise programs

| Section/Topic          | Item # | Checklist item                                                                                                                               | Location **                                 |                                                 |
|------------------------|--------|----------------------------------------------------------------------------------------------------------------------------------------------|---------------------------------------------|-------------------------------------------------|
|                        |        |                                                                                                                                              | Primary paper<br>(page, table,<br>appendix) | † Other (paper or<br>protocol, website<br>(URL) |
| <b>WHAT: materials</b> | 1      | Detailed description of the type of exercise equipment (e.g. weights, exercise equipment such as machines, treadmill, bicycle ergometer etc) | 15                                          |                                                 |
| <b>WHO: provider</b>   | 2      | Detailed description of the qualifications, teaching/supervising expertise, and/or <u>training</u> undertaken by the exercise instructor     | 12                                          |                                                 |
| <b>HOW: delivery</b>   | 3      | Describe whether exercises are performed individually or in a group                                                                          | 12                                          |                                                 |
|                        | 4      | Describe whether exercises are supervised or unsupervised and how they are delivered                                                         | 12                                          |                                                 |
|                        | 5      | Detailed description of how adherence to exercise is measured and reported                                                                   | 13                                          |                                                 |
|                        | 6      | Detailed description of motivation strategies                                                                                                | N/A                                         |                                                 |
|                        | 7a     | Detailed description of the decision rule(s) for determining exercise progression                                                            | 15                                          |                                                 |
|                        | 7b     | Detailed description of how the exercise program was progressed                                                                              | 15                                          |                                                 |
|                        | 8      | Detailed description of each exercise to enable replication (e.g. photographs, illustrations, video etc)                                     | 14 & ESM 2                                  |                                                 |
|                        | 9      | Detailed description of any home program component (e.g. other exercises, stretching etc)                                                    | N/A                                         |                                                 |
|                        | 10     | Describe whether there are any non-exercise components (e.g. education, cognitive behavioural therapy, massage etc)                          | 8 & 13                                      |                                                 |
|                        | 11     | Describe the type and number of adverse events that occurred during exercise                                                                 | N/A                                         |                                                 |

|                                  |     |                                                                                                                                                                                    |         |
|----------------------------------|-----|------------------------------------------------------------------------------------------------------------------------------------------------------------------------------------|---------|
| <b>WHERE: location</b>           | 12  | Describe the setting in which the exercises are performed                                                                                                                          | 12      |
| <b>WHEN, HOW MUCH: dosage</b>    | 13  | Detailed description of the exercise intervention including, but not limited to, number of exercise repetitions/sets/sessions, session duration, intervention/program duration etc | 12 & 14 |
| <b>TAILORING: what, how</b>      | 14a | Describe whether the exercises are generic (one size fits all) or tailored whether tailored to the individual.                                                                     | 12      |
|                                  | 14b | Detailed description of how exercises are tailored to the individual                                                                                                               | 12      |
|                                  | 15  | Describe the decision rule for determining the starting level at which people commence an exercise program (such as beginner, intermediate, advanced etc)                          | 11 & 15 |
| <b>HOW WELL: planned, actual</b> | 16a | Describe how adherence or fidelity to the exercise intervention is assessed/measured                                                                                               | 13      |
|                                  | 16b | Describe the extent to which the intervention was delivered as planned                                                                                                             | 15      |

**\*It is recommended that this checklist is used in conjunction with the Explanation and Elaboration Statement which is a guide each item in the CERT Checklist**

The CERT Checklist is designed for reporting details of an exercise intervention. The CERT Checklist should be used in conjunction with a reporting checklist appropriate for the study type e.g. the CONSORT Statement ([www.consort-statement.org](http://www.consort-statement.org)) for randomised controlled trials, the SPIRIT Statement ([www.spirit-statement.org](http://www.spirit-statement.org)) for a clinical trial protocol. For further guidance regarding reporting guidelines please consult the EQUATOR network ([www.equator-network.org](http://www.equator-network.org))

\*\* Authors – please use N/A if an item is not applicable

Reviewers – please use “?” if information is not provided or not/insufficiently reported

† If the information is not provided in the primary paper that is under consideration, please provide details of where this information is available e.g. in a published protocol, published papers (provide citation details) or on a website (provide the URL).
